# Supplementary material
Source: Springer Nature journal article supplement (https://www.springermedizin.de/resource/supplementary/12958_2012_1060_MOESM2_ESM.pdf/9566626)

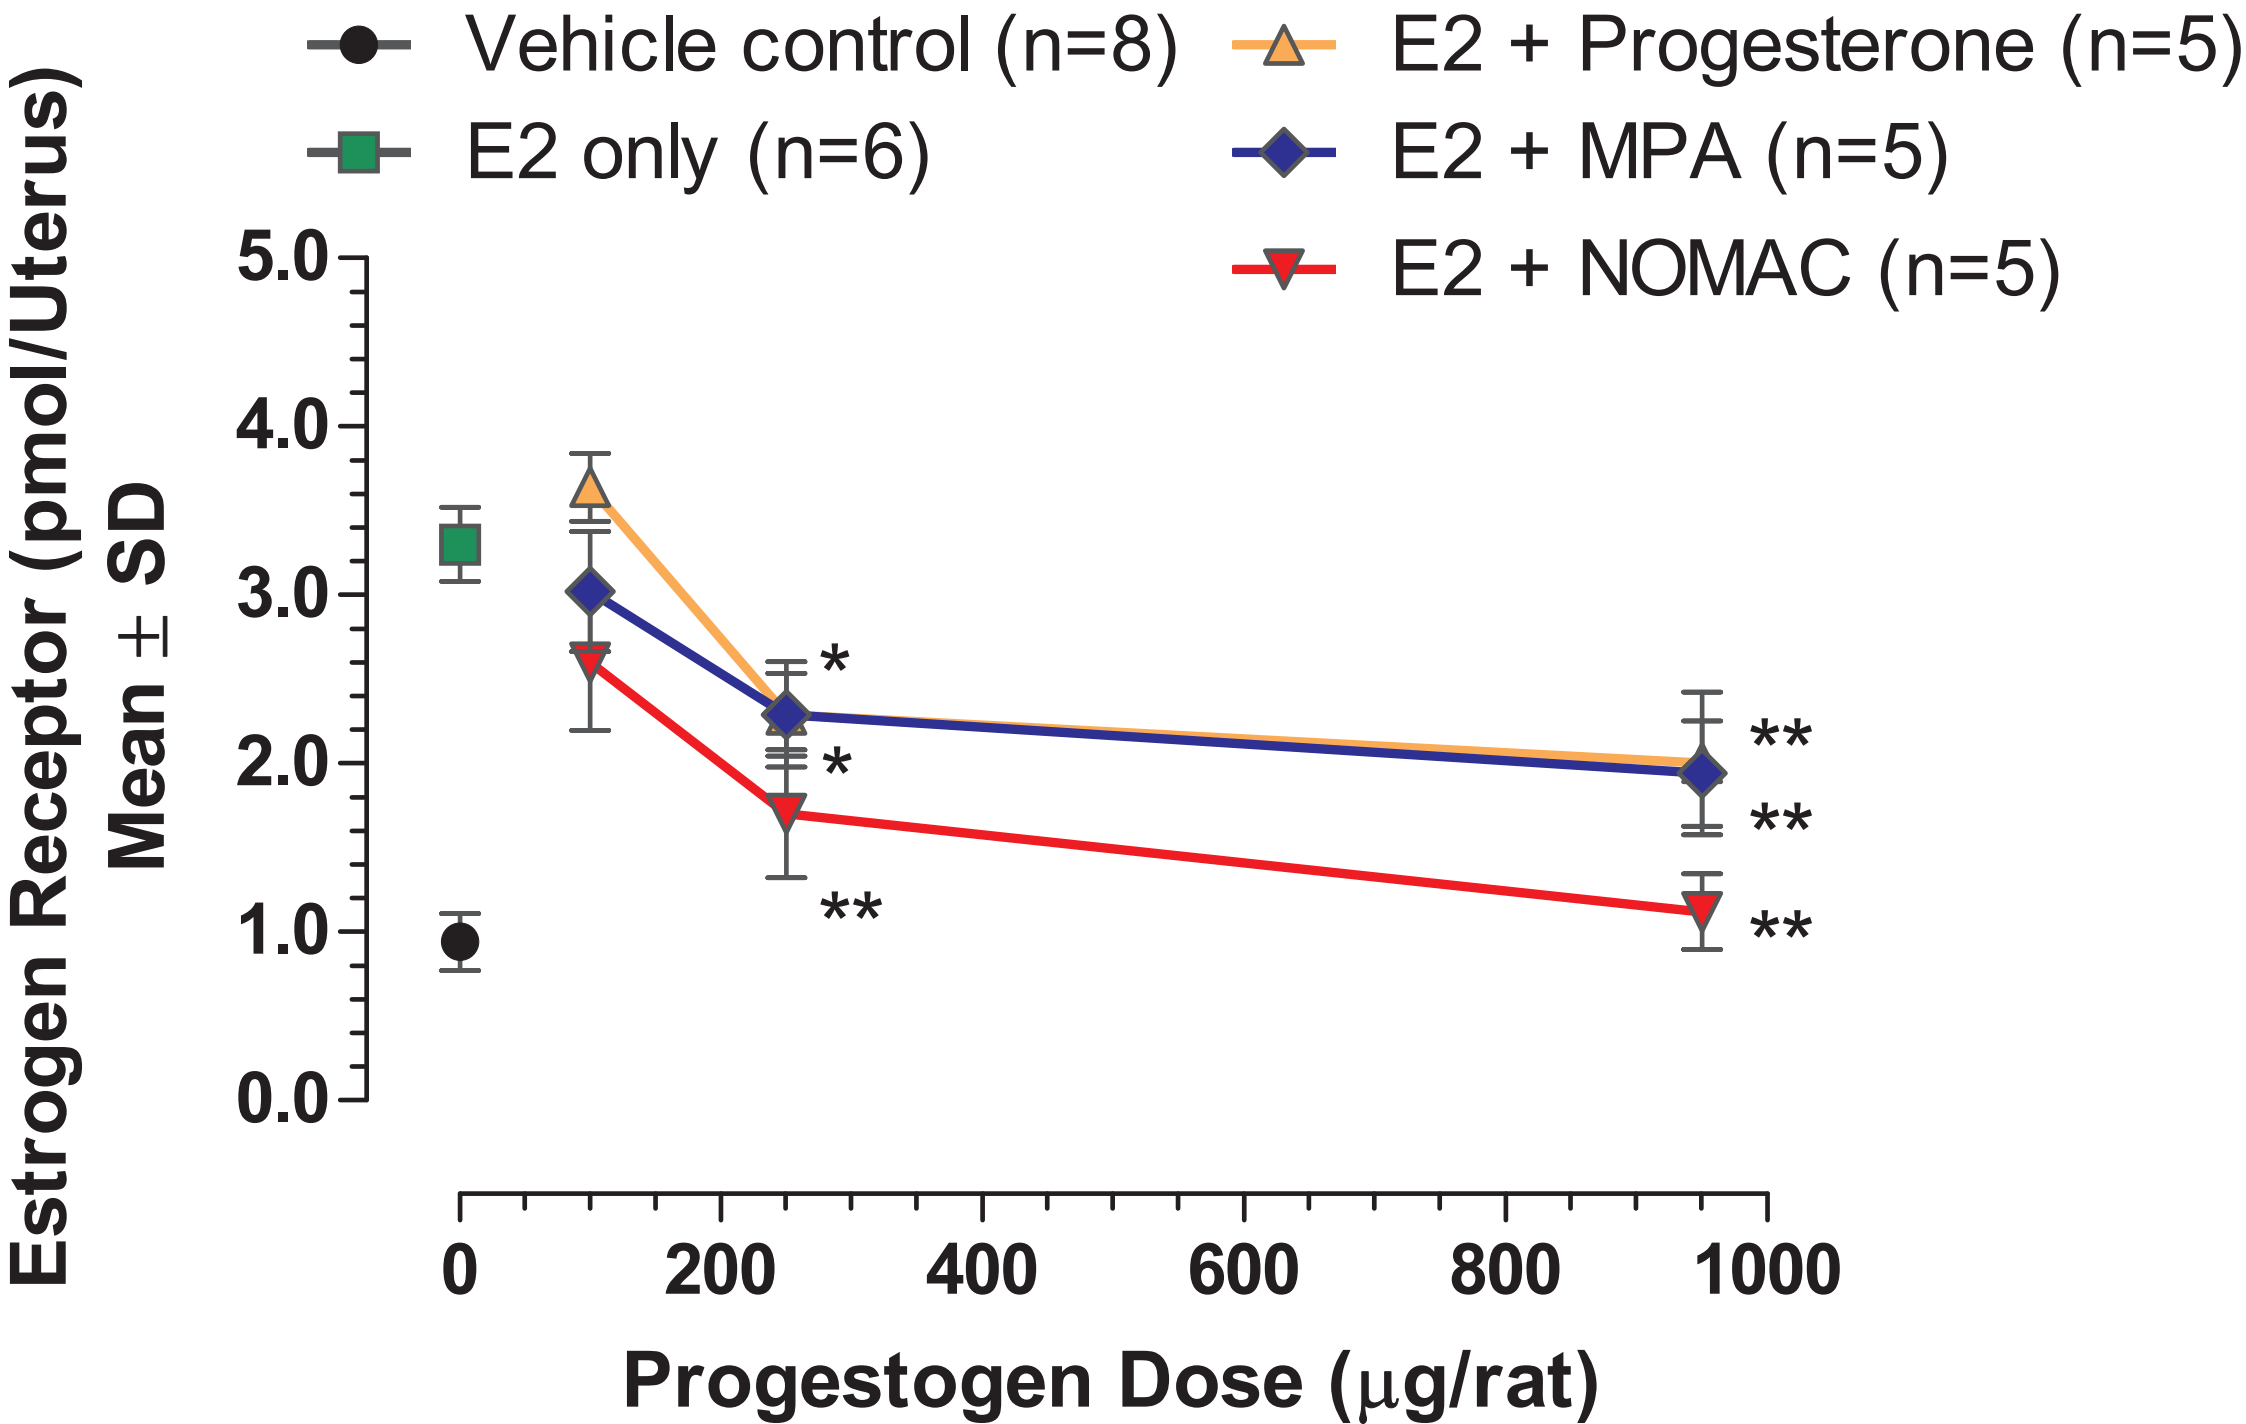

Supplement: MOESM2 [file 9566626]
